# Supplementary material
Source: publisher figshare collection journal article supplement (https://sage.figshare.com/ndownloader/files/17430347)
Supplement: Supplementary file 1 [file 17430347]

## Sheet: Hoja1
Citation in Article	Full Citation	Direct Quote from Source
USNACP-1	Telegram 10815, Department of State to American Embassy in Paris, September 20, 1965, in folder "Implementation and Dissemination of the Geneva Conventions", Rev. of U.S. Policy on Treatment of P.O.W.s to XXth Int'l Conf of the Red Cross, Records Relating to the Red Cross and the Geneva Conventions; 1941-1967, Office of the Legal Advisor Box 1, Entry A 1 5210, Record Group (RG) 59: General Record…	"I. Red Cross Conference -- Pursuant to resolution XIII at XIX Conference ICRC transmitted draft rules to governments for their consideration. Only 5 governments commented and their comments were not in accord. US merely acknowledged. Dept considers such draft rules deal with matters outside normal scope of Red Cross activities and may have potential propaganda value for unfriendly governments in…
USNACP-2	Copy of ICRC "Report of the Commission for International Humanitarian Law and Relief to Civilian Populations in Armed Conflicts, XXI International Conference of the Red Cross, Istanbul 1969", in folder "Vietnam, ICRC Conferences on Humanitarian Law (1972)", POW/Civilian Internee Information Center, Confidential Records, Letters concerning ICRC Activities 1971 to Misc Intelligence Reports, Records…	As cited in the article.
UKTNA-1	Draft Circular Letter "Human Rights in Armed Conflict", M.S. Baker-Bates, United Nations (E&S) Department, to Miss Lush, Legal Advisers Department, 12 August 1970, document 14, file Public Records Office (PRO) DEFE 24/1748, The National Archives (UK TNA), Kew Gardens, London	"U.K. Hopes: We recognize that the movement for revision of the Laws of War is now very strong. We can no longer, therefore, rely on our former position, namely that, if existing Law of war were properly observed, there would be no need for any revision. In consultation with Colonel Draper, we are now trying to formulate specific proposals. Ideally, we should like to see this whole discussion tak…
UKTNA-2	Copy of memorandum, "Revision of the Law of War: ICRC Conference of Government Experts, 1971", by Colonel G.I.A.D. Draper, to Vincent Evans, FCO, document 10, file PRO DEFE 24/1748, UK TNA	"Political pressures colour the United Nations activies [sic] in the field of Human Rights whereas a misguided and impractical humanitarianism determines the ICRC's endeavours. The linking of the two movements through the common bridge of Human Rights in Armed Conflicts, is formidable and needs careful study and preparation". Other references as cited in article.
USNACP-3	Memorandum, "Comments on the Report of the Secretary General, A/8052, 18 September 1970" by David A. Ellis, Foreign Affairs Specialist, to Mr Ralph Jefferson, Special Assistant on PW Affairs, Office Assistant Secretary of Defense (International Security Affairs), 28 October 1970, in POW/Civilian Internee Information Center, Confidential Records, 511-02 Diplomatic Conference in Geneva, 1974 to 511…	"Generally, the report fails to address the central issue of implementation of existing instruments of international law and wanders into speculation on issues not germane to human rights, namely: weapons, tactics, and targets. Because of Soviet maneuvering, and this latest adulteration of the subject, this document poses an insidious threat which should not be ignored and could be embarrassing i…
USNACP-4	Memorandum "Human Rights in Armed Conflicts" by Harry H. Almond, Jr., Office of Assistant General Counsel, International Affairs, to Mr. Warren E. Hewitt, Chief, Human Rights Division, Department of State, 1 October 1969, in folder "Human Rights in Armed Conflict (1969) in POW/Civilian Internee Information Center, Confidential Records, 511-02 Diplomatic Conference in Geneva, 1974 to 511-02 Misc I…	"Experience in particular with the question of forced labor which occupied the attention of the International Labour Organization before World War II illustrates the problems that are created when a great power such as the Soviet Union, which has used forced labor on a large scale prevented that area of human rights from becoming the subject of international concern. On the other hand, hypocritic…
UKTNA-3	Memorandum, "Respect for Human Rights in Armed Conflict", by H.W. King to Miss T.A.H. Solesby, UKMis New York, 21 August 1970, doc. 15, file PRO DEFE 24/1748, UK TNA	"The unknown factor in all of this is how far the ICRC are willing and able to play a leading role. As a non-political and strictly humanitarian body, we should like them to do as much as they can to promote successful discussions… Our aim in putting forward this tentative pattern of action is to try to ensure that discussion of Respect for Human Rights in Armed Conflict is carried forward as far…
UKTNA-4	UK Draft "Summary Report of Proceedings of Commission II dealing with Combatants, and the Protection of the Civilian Population and Journalists, Conference of Government Experts on International Humanitarian Law, May - June 1972", December 4 1972, doc. 74, file PRO FCO 66/422, UK TNA	"37. The American delegate, Major General Prugh, in an exceptionally ill-judged intervention, put forward the American delegation's view that the protection should be afforded not to the civilian population as a whole but to individual civilians. He argued that in modern warfare (obviously with the Vietnam war in mind) it was virtually impossible to distinguish between civilians and soldiers and …
UKTNA-5	Brief "Item 2, Strengthening of the protection of civilian Populations against dangers of hostilities, Conference of Governmental Experts on Humanitarian Law in Armed Conflict, International Committee of the Red Cross", 18 May 1971, IOC (71) 85, Ministry of Defence, doc. 165, file PRO FCO 61/810, UK TNA.	"8. Generally we regard the forthcoming Geneva Conference as a useful opportunity for informally exchanging views on the whole field of human rights in armed conflicts without at this stage taking up any hard and fas [sic] position… We should be as helpful and constructive as possible when discussing the proposals of the ICRC but at the same time making sure that any recommendations or proposals …
UKTNA-6	Report by the United Kingdom Delegation, International Committee of the Red Cross (ICRC) Conference of Government Experts on the Reaffirmation and Development of International Humanitarian Law Applicable in Armed Conflicts: Geneva 24 May-12 June, 1972, doc. 65, file PRO FCO 66/331. UK TNA	"4. The United Kingdom Delegation emphasised that HMG were not opposed to an extension of international humanitarian law in this area. They made it clear, however, that HMG considered it necessary to maintain balance between humanitarian considerations and military practicalities. Any further rules must, moreover, be clear and simple enough to be practical in the battlefield conditions of modern …
UKTNA-7	Enclosure, US "General Considerations on Protection of Civilians", 24 November 1971, doc 49, file PRO FCO 61/821, UK TNA.	"1. Rules should be clear and capable of application. 2. In general, best efforts provisions would be more acceptable and realistic than absolute rules…"
UKTNA-8	United Kingdom Brief, "Agenda Item 1: Measures intended to enforce the implementation of the existing law", International Committee of the Red Cross Conference on Humanitarian Law in Armed Conflicts, Geneva 24 May - 12 June, doc. 58, file PRO FCO 66/330, UK TNA	"19. It may be that the Conference will discuss the abolition of reprisals against civilians in all circumstances. It would be very difficult to argue against this humanitarian proposition, but in the conduct of military operations we could be in great difficult if our freedom of operation were limited in this way..."
UKTNA-9	Draft Submission (Memorandum), "International Committee of the Red Cross Conference on Humanitarian Law in Armed Conflicts, Geneva 24 May - 12 June", from V. Evans, FCO, to Mr. Kerby, Parliamentary Under-Secretary's Office, doc. 159, file PRO FCO 61/810, UK TNA.	"If we continue to assert that 'freedom fighters' should not be given further protection we may well find ourselves In a small minority and (in that context) in the undesirable company of South Africa and Portugal…"
UKTNA-10	UK Brief, "Commentary on ICRC Draft Protocol I Additional to the Four Geneva Conventions of 1949 for the Protection of War Victims, International Committee of the Red Cross Conference of Government Experts on the Reaffirmation and Development of International Humanitarian Law Applicable in Armed Conflicts", 3 May 1972, doc. 28, file PRO FCO 66/421, UK TNA	"Article 45: Respect for the Civilian Population… This Article creates a number of difficulties… Ideally Paragraph 1 should be deleted altogether. It could not in any case be implemented in the event of the use of nuclear weapons. If it is impossible to secure its deletion and provided a suitable way is found to deal with the difficulties created by nuclear weapons, the delegation may agree to it…
UKTNA-11	UK Brief, "Commentary on ICRC Draft Protocol I Additional to the Four Geneva Conventions of 1949 for the Protection of War Victims, International Committee of the Red Cross Conference of Government Experts on the Reaffirmation and Development of International Humanitarian Law Applicable in Armed Conflicts", 3 May 1972, doc. 28, file PRO FCO 66/421, UK TNA	"Article 50: Principle of Proportionality… When launching an attack commanders in the British Forces already take into account the probable balance between on the one hand the loss they are likely to sustain and the probable destructin they are likely to create and on the other the military advantage they are likely to obtain. However, their decisions are necessarily subjective because the data n…
UKTNA-12	UK Draft "Summary Report of Proceedings of Commission II dealing with Combatants, and the Protection of the Civilian Population and Journalists, Conference of Government Experts on International Humanitarian Law, May - June 1972", December 4 1972, doc. 74, file PRO FCO 66/422, UK TNA	"The basic aim of giving greater protection to the civilian population and other objects used by them was espoused by all; it is clearly the sort of proposition that it is difficult to produce respectable reasons for opposing. The main difference came between those who wished to make a protection of civilians practically absolute, or as wide-ranging as they possibly could, and those who insisted …
UKTNA-13	UK Draft "Summary Report of Proceedings of Commission II dealing with Combatants, and the Protection of the Civilian Population and Journalists, Conference of Government Experts on International Humanitarian Law, May - June 1972", December 4 1972, doc. 74, file PRO FCO 66/422, UK TNA	"The Soviet Union and the Eastern Bloc, particularly East Germany and Rumania laid particular stress upon this part of the protocol stating that it was to them the most important part. They posed as the champions of a scale of protection for the civilian population which, one suspects, their armed forces (who were not represented at on their delegations) would not dream of attempting to apply in …
UKTNA-14	Memorandum, "Diplomatic Conference on Human Rights in Armed Conflict February/March 1974" by M R Eaton, Legal Adviser, 5 June 1973, to Vincent Evans, FCO, doc. 100, file PRO FCO 61/1090, UK TNA	"d) The Protection of Civilians. 9. All the ICRC drafts, both earlier and more recent, have proposed extremely wide-ranging protection for civilians. They propose for instance complete bans on attacks on growing crops, dams and other objects indispensable to the survival of the civilian population, and require a commander when attacking to ensure that he never attacks a civilian object and gives …
UKTNA-15	UK Draft "Summary Report of Proceedings of Commission II dealing with Combatants, and the Protection of the Civilian Population and Journalists, Conference of Government Experts on International Humanitarian Law, May - June 1972", December 4 1972, doc. 74, file PRO FCO 66/422, UK TNA	"Other delegations, whilst taking a much more reasonable attitude than these, evidently felt that the United States, the United Kingdom, and other delegations who agreed with us were too grudging in the protection they were prepared to give and too concerned to preserve the freedom of action of our military. This was particularly true on Articles 45, 49 and 50 where the Federal Republic of German…
FRA-1	Report, "Rapport du Professeur BRETTON, chef de la delegation française, Conférence Restreinte d'Experts Gouvernamentaux Organisée par le C.I.C.R. à Genève du 5 au 9 mars 1973", March 30 1973, folder "Droits de l'Homme en période de conflit armé", cote S.50.3.8.2.6, box 1297, Nations et Unies Organisations Internationales (NUIO), Archives Diplomatiques de la Courneuve, France	"Il est à noter que l'expert soviétique est radicalement hostile au principe de proportionnalité, dans lequel il voit une excuse commode pour se soustraire a l'application du Protocole et qu'il voudrait voir supprimer"
UKTNA-16	Steering Brief for the United Kingdom Experts Participating in First Session of ICRC Consultative Group on Humanitarian Law Applicable in Armed Conflicts, Geneva, 15-20 January 1973, ICO(73)10, 1 February 1973, doc. 34, file PRO FCO 66/546, UK TNA	"10. The UK proposal for Article 43 was, however, not popular. Virtually all Delegations which spoke on it considered that it allowed the military far too much latitude. Even our colleagues on the Western Group, apart from the US, held this view"
USNACP-5	Report of the United States Delegation to the Conference of Government Experts on the Reaffirmation and Development of International Humanitarian Law Applicable in Armed Conflicts, Second Session, Geneva Switzerland, May 3-June 2, 1972, in folder "Vietnam, Resume of Congressional Hearings Human Rights in Armed Conflicts (1972)", in POW/Civilian Internee Information Center, Unclassified Records, 1…	"The United States expert expressed the desire of the United States Government to increase the protection of innocent victims of armed conflict, but emphasized certain concerns. Key among them was the fact that modern warfare includes civilians in the battlefield, and it has become increasingly difficult to prevent the intermingling of military and civilian activities and to separate and protect …
UKTNA-17	Memorandum, "Humanitarian Law Applicable in Armed Conflicts: Preparations for the 1974 Diplomatic Conference", by T W Keeble, United Nations Department, 1 March 1973, doc. 74, file PRO FCO 61/1090, UK TNA	"6. The ICRC has a difficult task in holding the ring. It is resisting proposals designed to deal with weapons but is sympathetic towards those who wish to take all unpleasantness out of war. It has supported unrealistic proposals in this direction. 7. The Western Working Group mentioned above was convened partly to assist the ICRC in their difficulties. Despite the wide scope and forthcoming nat…
UKTNA-18	Letter, "Humanitarian Law in Armed Conflict", by Miss A (Anne) M Warburton, to I (Ian) E C Ellison, United Nations Department, FCO, 23 March 1973, doc. 89, file PRO FCO 61/1090, UK TNA	"M. Pilloud recognized that his paper would not be very welcome but spoke of the very strong pressures to which the ICRC is being subjected. He put forward two arguments to support the view that it would not be realistic to account in their drafting for the variety of views strongly held on certain controversial topics. First, the ICRC needs to be accepted by, and have the confidence of, the deve…
UKTNA-19	Letter, James Makin, MOD, to Ian Ellison, FCO, 23 March 1973, doc 81, file PRO FCO 61/1090, UK TNA	"One of the main factors which will condition how we work will be in the arrangements under which the Conference will operate… if I am right about the two-thirds majority, it means that there will have to be more than 40 nations to create a blocking third... we shall need about 40 like minded people. I had mentioned this to George Aldrich and he said in his very vague way, that he would cover the…
UKTNA-20	Copy of US Draft Position Paper, "Protocol I (international Conflicts) Article 46. -- Protection of the civilian population", January 8, 1974, doc. 14, file PRO FCO 61/1237, UK TNA	Refers to entire document
UKTNA-21	UK Brief, "Humanitarian Law in Armed Conflict - Diplomatic Conference on the Reaffirmation and Development of International Humanitarian Law Applicable in Armed Conflict, Geneva, 20 Feb - 29 March 1974", IOC(74)30, 14 February 1974, doc. 18, file PRO FCO 66/681, UK TNA	"UK Line. Delete the present text and substitute the alternative text below. If that is successful, accept that the Article should be non-reservable. In view of the tactical importance of this Article, no formula diverging from the Western draft should be accepted without reference back. Suggested Alternative Text. '1. Attacks shall be strictly limited to military objectives, namely those which b…
USNACP-6	Electronic Telegram, 1974STATE039733, Secretary of State, Washington to US Consulate, Jerusalem, 28 February, 1974, Central Foreign Policy File, 1973-1979, RG 59: General Records of the Department of State (Accessed Online)	"9. Comment: It appears that, without rules of procedure, we are at the mercy of approximately 2 to 1 majority of Africans, EE's, some Asians, Sweden, Norway and friends. They show no inclination to behave reasonably or to apply any rational standards to the carrying on of the debate. This augers ill both for the immediate future--i.e., the outcome on national liberation movements and on the PRG-…
USNACP-7	Telegram, R0819237 Mar 74, from US Mission in Geneva to RUEHC/SecState Washington DC, in folder "Vietnam Geneva Laws of War Conf (1974)", POW/Civilian Internee Information Center, Confidential Records, 511-02 Diplomatic Conference in Geneva, 1974 to 511-02 Misc ICRC letters, 1969-1970, Records of the Provost Marshal General, 1941-, Box 9, Entry P1, RG 389, US NACP	"1. After nearly three weeks of largely political wrangling, the conference has finally adopted its rules of procedure and established its four main committees… 2. During political phase of conference, following are our principal accomplishments: denial of invitation to PRG; acceptance (only today) of decent rules of procedure, including two-thirds vote requirement for adoption of texts and other…
UKTNA-22	UK Delegation Deport, Diplomatic Conference on Humanitarian Law in Armed Conflict, Geneva, 20 February - 29 March 1974, IOC(74)112, doc. 165, file PRO FCO 61/1233, UK TNA	"COMMITTEE III. 26. The agenda of this Committee was Article 33 to 53 and 63 to 69 of Protocol I, and Articles 20 to 29 and Article 32 of Protocol II By the standards of the other Committees it was relatively productive. Four and two-thirds of the total of five and two-thirds Articles adopted in all Committees were in fact adopted in Committee III. This was partly due to the quality of the office…
USNACP-8	US Classified Report of the United States Delegation to the Diplomatic Conference on the Reaffirmation and Development of International Humanitarian Law Applicable in Armed Conflicts, Geneva, Switzerland, February 20 - March 29 1974, submitted to the Secretary of States by George H. Aldrich, Chairman of the Delegation, June 10, 1974, USNACP. On file with author.	"There is a widespread ignorance among the participants in the Conference of both war and humanitarianism as an 'art of the possible.' Delegations would not infrequently call for sweeping prohibitions of activity, such as propaganda or anything that in fact causes terror in the civilian population, on the ground that it is 'inhumane.' They were insensitive to the compromises that the law must mak…
UKTNA-23	UK Delegation Deport, Diplomatic Conference on Humanitarian Law in Armed Conflict, Geneva, 3 February - 18 April: Second Session, IOC(75)145, doc. 134, file PRO FCO 61/1374, UK TNA	"3. Committee III met on twenty-eight occasions. All remaining Articles on the programme, and the amendments thereto, were discussed in Committee and were remitted for further discussion in a Working Group. This group, which was where the real work was done, had no fixed composition. All members of the Committee who were interested in the Article under discussion were entitled to attend and speak…
USNACP-9	US Classified Report of the United States Delegation to the Diplomatic Conference on the Reaffirmation and Development of International Humanitarian Law Applicable in Armed Conflicts, Geneva, Switzerland, February 20 - March 29 1974, submitted to the Secretary of States by George H. Aldrich, Chairman of the Delegation, June 10, 1974, USNACP. On file with author.	"While Egypt was a co-sponsor and a strong supporter of the proposal concerning wars of national liberation, the Egyptian Delegation showed itself to be conciliatory and conscious of the danger of pushing the matter too far and too fast. The United States Delegation had excellent relations with the Egyptian Delegation, and the latter on more than one occasion was helpful in getting other states i…
UKTNA-24	Letter, "Weaponry", J G Taylor, United Kingdom Delegatin to the Conference of the Committee on Disarmament, to Miss B Richards, Arms Control and Disarmament, FCO, 1 September 1975, doc 128A, file PRO FCO 66/819, UK TNA.	"2. It seems to me that the basic Russian and British approaches to this subject are indeed similar. We are both concerned to give some sort of positive response to international humanitarian pressure; on the other hand, we both wish to resist unrealistic prohibitions. It is in our tactical approach that we seem most to differ... If we are going to pursue the idea of a bilateral discussion with t…
USNACP-10	Electronic Telegram, 1974STATE246163, Secretary of State, Washington to US Embassy Moscow, November 8 1974, Central Foreign Policy File, 1973-1979, RG 59: General Records of the Department of State (Accessed Online)	"During informal side discussion at Lucerne Conference on Weapons (September 24-October 18, 1974), Blischenko (USSR) repeatedly urged Bettauer and Anderson of USDEL that it essential that USG and USSR have bilateral consultations in advance of second session. Department agrees that such consultations would be desirable and useful. We therefore request you to propose to Soviets that we have such c…
USNACP-11	Electronic Telegram, 1974MOSCOW17336, US Embassy Moscow to Secretary of State, Washington, November 15 1974, Central Foreign Policy File, 1973-1979, RG 59: General Records of the Department of State (Accessed Online)	4. ON THE MORE GENERAL ATMOSPHERE FOR THE CONFERENCE, MAYORSKIY SAID THAT THE FIRST CONFERENCE HAD SOUGHT TO AVOID PROBLEM AREAS, WITH THE RESULT THAT IT AVOIDED PRODUCING EVEN ONE DOCUMENT. THE SECOND CONFERENCE WOULD BE UNDER CONSIDERABLE PRESSURE TO PRODUCE SOMETHING. (HE IMPLIED THAT THIS PRESSURE WAS DIRECTED AT BOTH THE SOVIETS AND THE AMERICANS BY THIRD COUNTRIES.) SUCH A CONFERENCE WAS RE…
USNACP-12	Electronic Telegram, 1974MOSCOW18002, US Embassy Moscow to Secretary of State, Washington, November 29 1974, Central Foreign Policy File, 1973-1979, RG 59: General Records of the Department of State (Accessed Online)	Refers to entire document
USNACP-13	Electronic Telegram, 1974STATE263490, Secretary of State, Washington to US Embassy Moscow, November 29 1974, Central Foreign Policy File, 1973-1979, RG 59: General Records of the Department of State (Accessed Online)	Refers to entire document
USNACP-14	Electronic Telegram, 1975MOSCOW00276, US Embassy Moscow to Secretary of State, Washington, January 8 1975, Central Foreign Policy File, 1973-1979, RG 59: General Records of the Department of State (Accessed Online)	Refers to entire document
USNACP-15	Electronic Telegram, 1975MOSCOW01164, US Embassy Moscow to Secretary of State, Washington, January 27 1975, Central Foreign Policy File, 1973-1979, RG 59: General Records of the Department of State (Accessed Online)	Refers to entire document
USNACP-16	Electronic Telegram, 1975GENEVA00612, US Mission in Geneva to Secretary of State, Washington, February 1 1975, Central Foreign Policy File, 1973-1979, RG 59: General Records of the Department of State (Accessed Online)	"USDEL HAD BILATERAL CONSULTATIONS ON INTERNATIONAL HUMANITARIAN LAW WITH USSR DEL ON FEB 1 IN USMISSION. CONSULTATIONS, WHICH AVOIDED VIETMAN ISSUE, SHOWED LARGELY SIMILAR POSITIONS. SOVS VERY APPRECIATIVE OF BEING INVITED TO CONSULTATIONS AND OF CORDIAL ATMOSPHERE. WE AGREED TO CONSULT FURTHER AS REQUIRED DURING CONFERENCE"
USNACP-17	US Electronic Telegram, 1977MOSCOW02442, US Embassy Moscow to Secretary of State, Washington, February 22 1977, Central Foreign Policy File, 1973-1979, RG 59: General Records of the Department of State (Accessed Online)	Refers to entire document
UKTNA-25	Telegram, "Conference on Humanitarian Law: Report for week ending February 28", from UK Mission in Geneva to FCO, 4 March 1975, doc. 53, file PRO FCO 61/1373, UK TNA	"The majority of the time allocated to Committeee III was taken up with meetings of the Working Group. This Group held a lengthy debate on a text for Article 48 in which a number of points of view was expressed. Most appeared irrelevant to the purposes of the Article, but for the sake of compromise had to be accomodated. In consequence the shape of the Article now to be transmitted to the full co…
